# Supplementary material for: Integrated systems biology analysis of KSHV latent infection reveals viral induction and reliance on peroxisome mediated lipid metabolism
Source: PubMed Central journal article supplement (PMC5352148; doi:10.1371/journal.ppat.1006256), 2017-03-03
Supplement: ppat.1006256.s008.pdf [file ppat.1006256.s008.pdf]

**Supplementary Table 1. Complete list of the top KEGG Pathways that overlapped significantly with the predicted Steiner Forest Network.**

| <b>Pathway name</b>                         | <b># Genes</b> | <b>Adjusted p-value</b> |
|---------------------------------------------|----------------|-------------------------|
| Huntington's disease                        | 24             | 0.0002                  |
| Parkinson's disease                         | 17             | 0.001                   |
| Vasopressin-regulated water reabsorption    | 10             | 0.0012                  |
| DNA replication                             | 8              | 0.0061                  |
| Alzheimer's disease                         | 18             | 0.0081                  |
| ECM-receptor interaction                    | 12             | 0.0095                  |
| Phagosome                                   | 17             | 0.0104                  |
| Endocytosis                                 | 20             | 0.0152                  |
| Citrate cycle (TCA cycle)                   | 6              | 0.0234                  |
| Propanoate metabolism                       | 6              | 0.0243                  |
| Leukocyte transendothelial migration        | 13             | 0.0243                  |
| Hepatitis C                                 | 14             | 0.0243                  |
| Protein processing in endoplasmic reticulum | 16             | 0.0336                  |
| Long-term potentiation                      | 9              | 0.0353                  |
| Pathways in cancer                          | 26             | 0.0389                  |
| Pancreatic cancer                           | 9              | 0.0389                  |
| Focal adhesion                              | 18             | 0.0389                  |
| Regulation of actin cytoskeleton            | 19             | 0.0389                  |
| Oxidative phosphorylation                   | 12             | 0.0389                  |
| Adherens junction                           | 9              | 0.0389                  |
| Fc gamma R-mediated phagocytosis            | 10             | 0.0578                  |
| Lysine degradation                          | 6              | 0.0578                  |
| Peroxisome                                  | 9              | 0.0578                  |
| Cell cycle                                  | 12             | 0.0628                  |
| RNA transport                               | 13             | 0.0732                  |
| Basal transcription factors                 | 5              | 0.0732                  |
| Dilated cardiomyopathy                      | 9              | 0.0732                  |
| Antigen processing and presentation         | 8              | 0.0732                  |
| Pancreatic secretion                        | 9              | 0.0751                  |
| Fructose and mannose metabolism             | 5              | 0.0751                  |
| Vascular smooth muscle contraction          | 10             | 0.081                   |
| Insulin signaling pathway                   | 12             | 0.0851                  |
| Hypertrophic cardiomyopathy (HCM)           | 8              | 0.0858                  |
| Long-term depression                        | 7              | 0.0858                  |
| RIG-I-like receptor signaling pathway       | 7              | 0.0879                  |
| Chemokine signaling pathway                 | 15             | 0.0963                  |
